# Supplementary material for: Health-Promoting Effects of Thymus herba-barona, Thymus pseudolanuginosus, and Thymus caespititius Decoctions
Source: MDPI journal article supplement (doi:10.3390/ijms18091879), 2017-08-31
Supplement: s1 [file s1]

**Supplementary Material S1.****Table 1.** Linearity, LOD and LOQ of four standard compounds used as references.

| Standard Compound | Range concentration (µg/mL) | n <sup>a</sup> | Slope <sup>b</sup> (area counts/mg) | Intercept <sup>b</sup> (area counts /mg) | R <sup>2</sup> | LOD (µg/mL) | LOQ (µg/mL) |
|-------------------|-----------------------------|----------------|-------------------------------------|------------------------------------------|----------------|-------------|-------------|
| L-7O-G            | 1 - 50                      | 6              | 204(±1) × 10 <sup>5</sup>           | -8(±3) × 10 <sup>3</sup>                 | 0.9996         | 1.6         | 4.9         |
| RA                | 26 - 517                    | 6              | 194(±4) × 10 <sup>5</sup>           | -1(±1) × 10 <sup>5</sup>                 | 0.9970         | 52.1        | 158.0       |
| A-7O-G            | 1 - 50                      | 6              | 189(±2) × 10 <sup>5</sup>           | -4(±3) × 10 <sup>3</sup>                 | 0.9994         | 2.1         | 6.3         |
| E-7O-G            | 1 - 100                     | 6              | 149(±1) × 10 <sup>5</sup>           | 4(±41) × 10 <sup>2</sup>                 | 0.9997         | 3.1         | 9.2         |

LOD and LOQ were defined as 3.3 and 10 times the value of the regression error divided by the slope, respectively; L-7O-G: luteolin-7-O-glucoside; RA: rosmarinic acid; A-7O-G: apigenin-7-O-glucoside; E-7O-G: eriodictyol-7-O-glucoside; <sup>a</sup> Number of points used for the regression of standard solutions. Injections were done in triplicate; <sup>b</sup> The standard deviation in the slope and intercept of the regression line is shown in parentheses.
